# Supplementary material for: Evaluation of denitrification and decomposition from three biogeochemical models using laboratory measurements of N 2 , N 2 O and CO 2
Source: Copernicus journal article supplement (doi:10.5194/bg-18-5681-2021), 2021-10-21
Supplement: Supplementary file 1 [file bg-18-5681-2021-supplement.pdf]

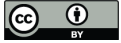

*Supplement of*

**Evaluation of denitrification and decomposition from three biogeochemical models using laboratory measurements of N<sub>2</sub>, N<sub>2</sub>O and CO<sub>2</sub>**

**Balázs Grosz et al.**

*Correspondence to:* Balázs Grosz ([balazs.grosz@thuenen.de](mailto:balazs.grosz@thuenen.de))

The copyright of individual parts of the supplement might differ from the article licence.

## Supplementary material

### Figures and tables

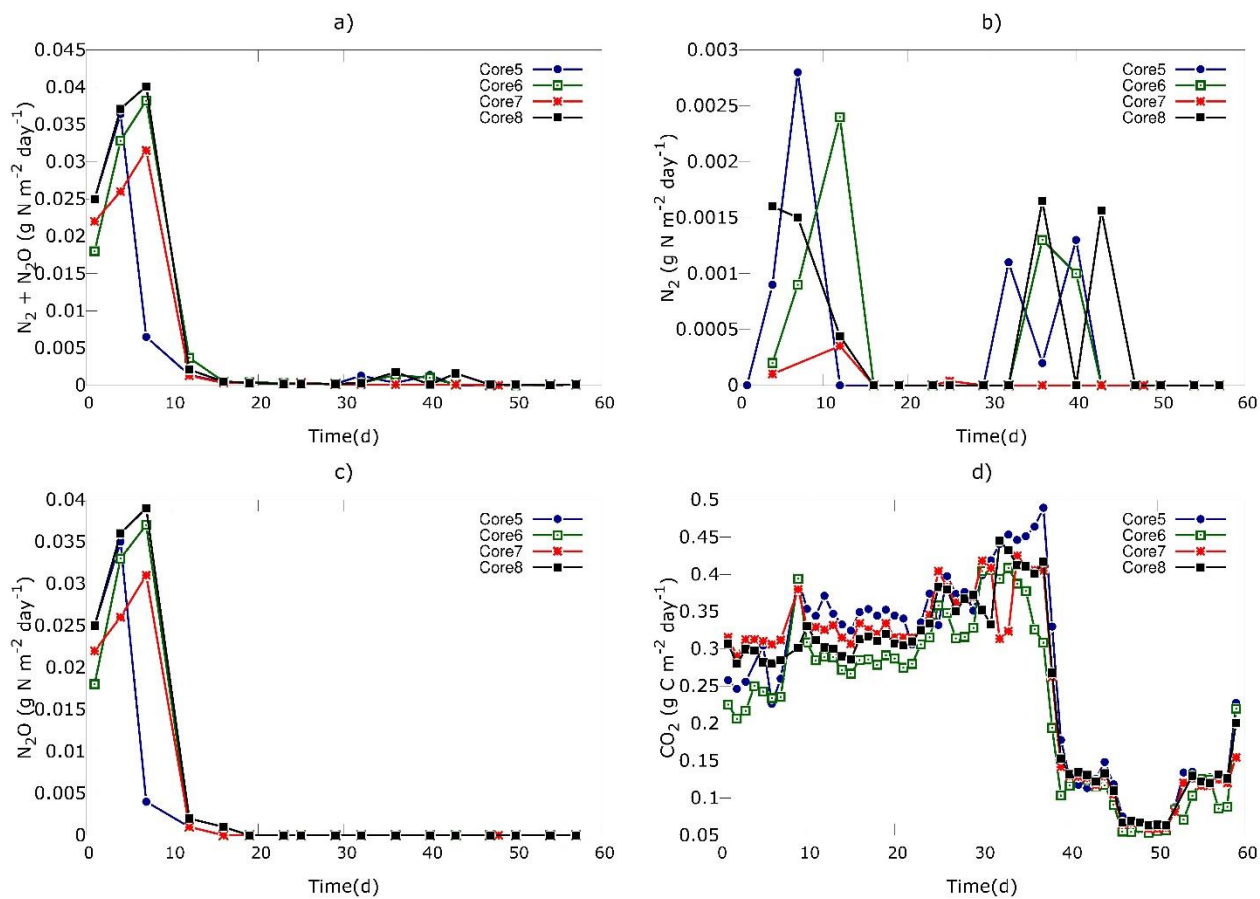

5

Figure S1 a-d: Measured fluxes of (a)  $N_2+N_2O$ , (b)  $N_2$ , (c)  $N_2O$  and (d)  $CO_2$  throughout a laboratory incubation of a sandy, arable soil from Fuhrberg, Germany. The four re-packed soil cores shown had no ryegrass amendment prior to incubation.

10

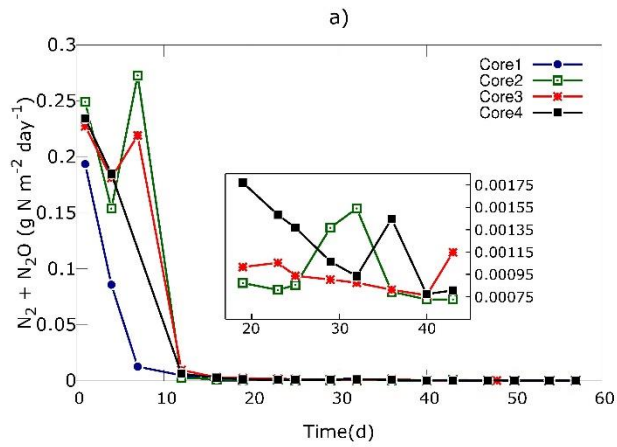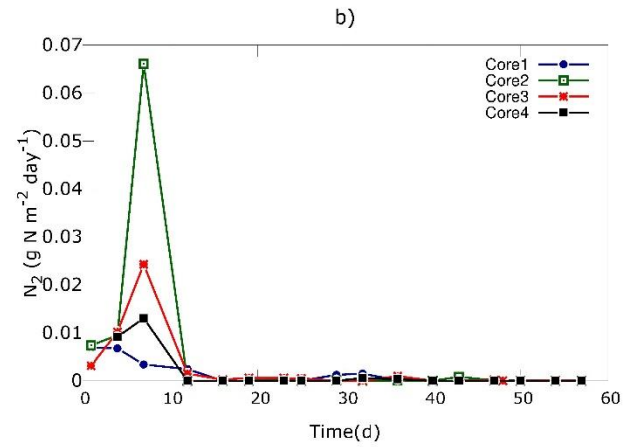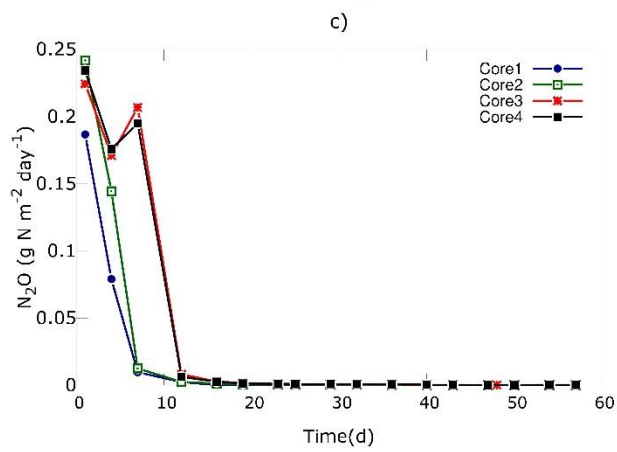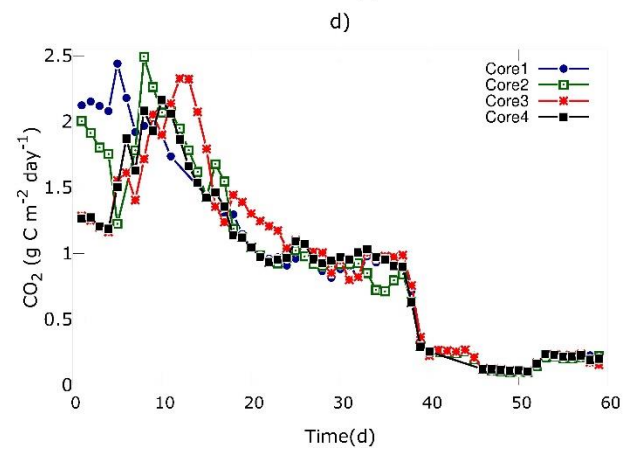

15

**Figure S2 a-d:** Measured fluxes of (a)  $N_2+N_2O$ , (b)  $N_2$ , (c)  $N_2O$  and (d)  $CO_2$  throughout a laboratory incubation of a sandy, arable soil from Fuhrberg, Germany. The four re-packed soil cores shown were amended with ryegrass prior to incubation. The nested figure in figure (a) shows the effect of the irrigation and fertilization event on Day 32.

20

25

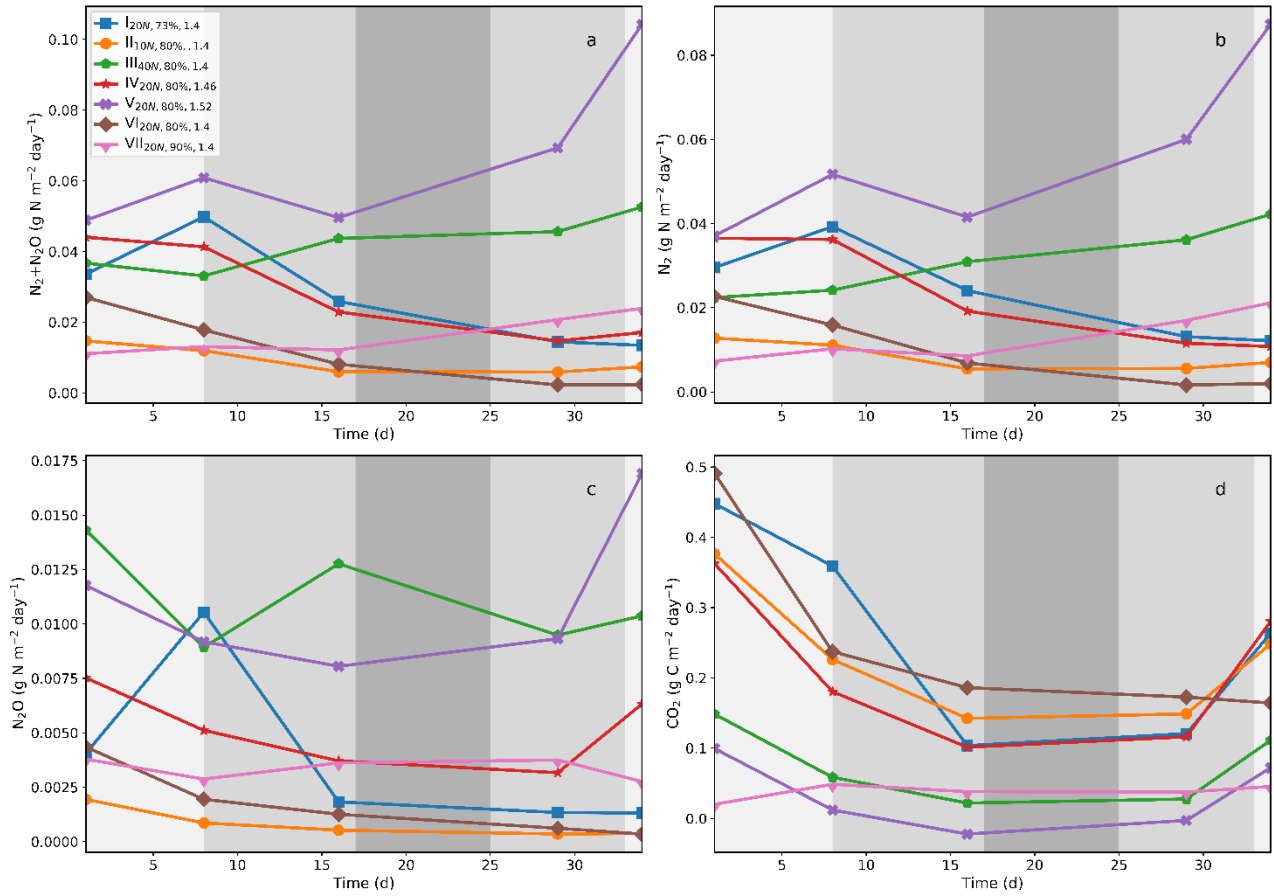

30

**Figure S3 a-d:** Measured fluxes of  $\text{N}_2+\text{N}_2\text{O}$  (a),  $\text{N}_2$  (b),  $\text{N}_2\text{O}$  (c) and  $\text{CO}_2$  (d) of an arable, silt-loam soil from Hattorf, Germany (values shown are the mean of four replicates over a 34 days laboratory incubation). The background colors show the temperature during each time period (light grey: 10°C, middle grey: 6°C, dark grey: 2°C).

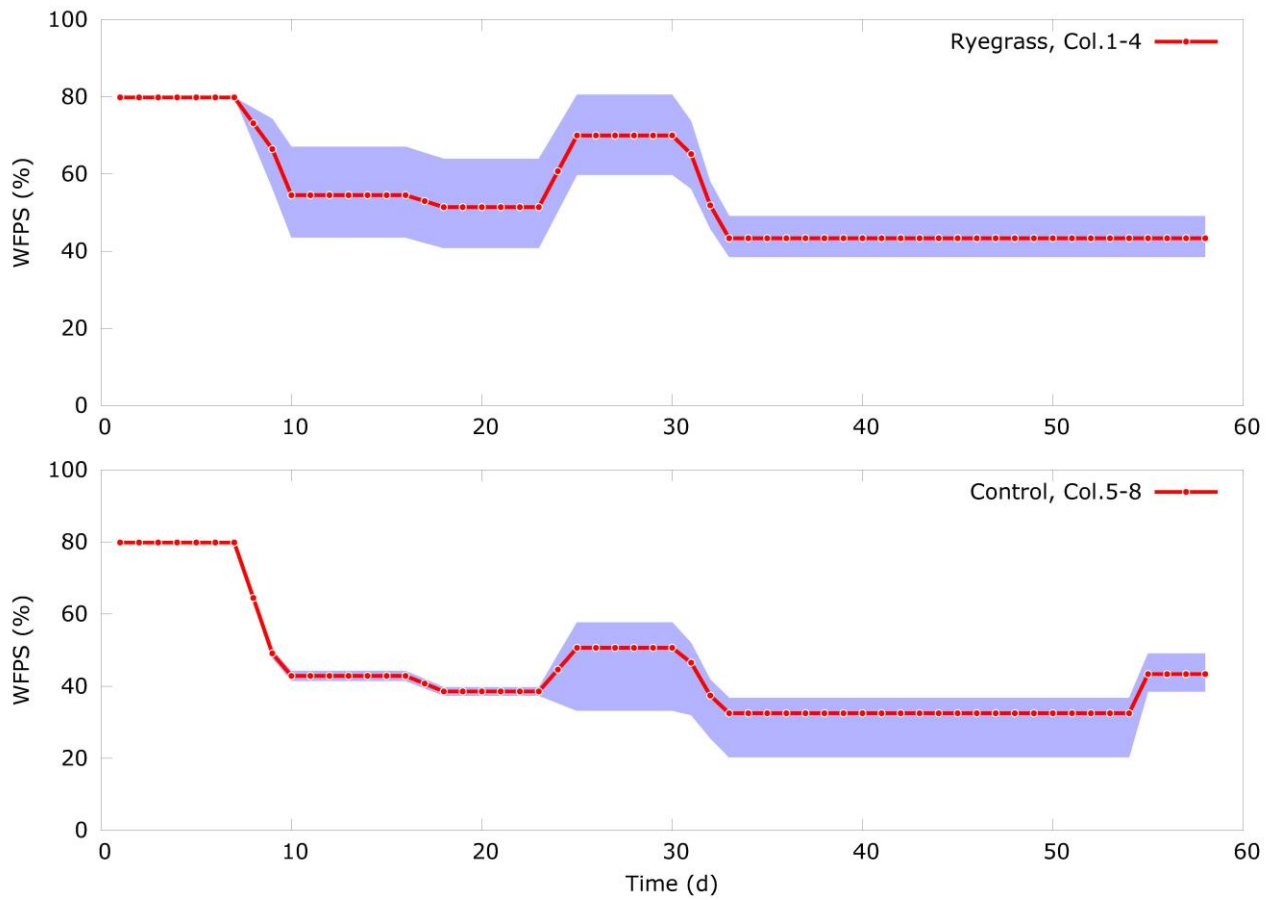

Figure S4: the change in WFPS of eight (2 treatments, 4 parallel columns) re-packed soil columns of a sandy arable soil from Fuhrberg, Germany, over the course of a laboratory incubation. Soil in columns 1-4 had ryegrass incorporated prior to incubation, and Columns 5-8 were without ryegrass. The red line is the mean value, and the blue areas are the SD.

40

45

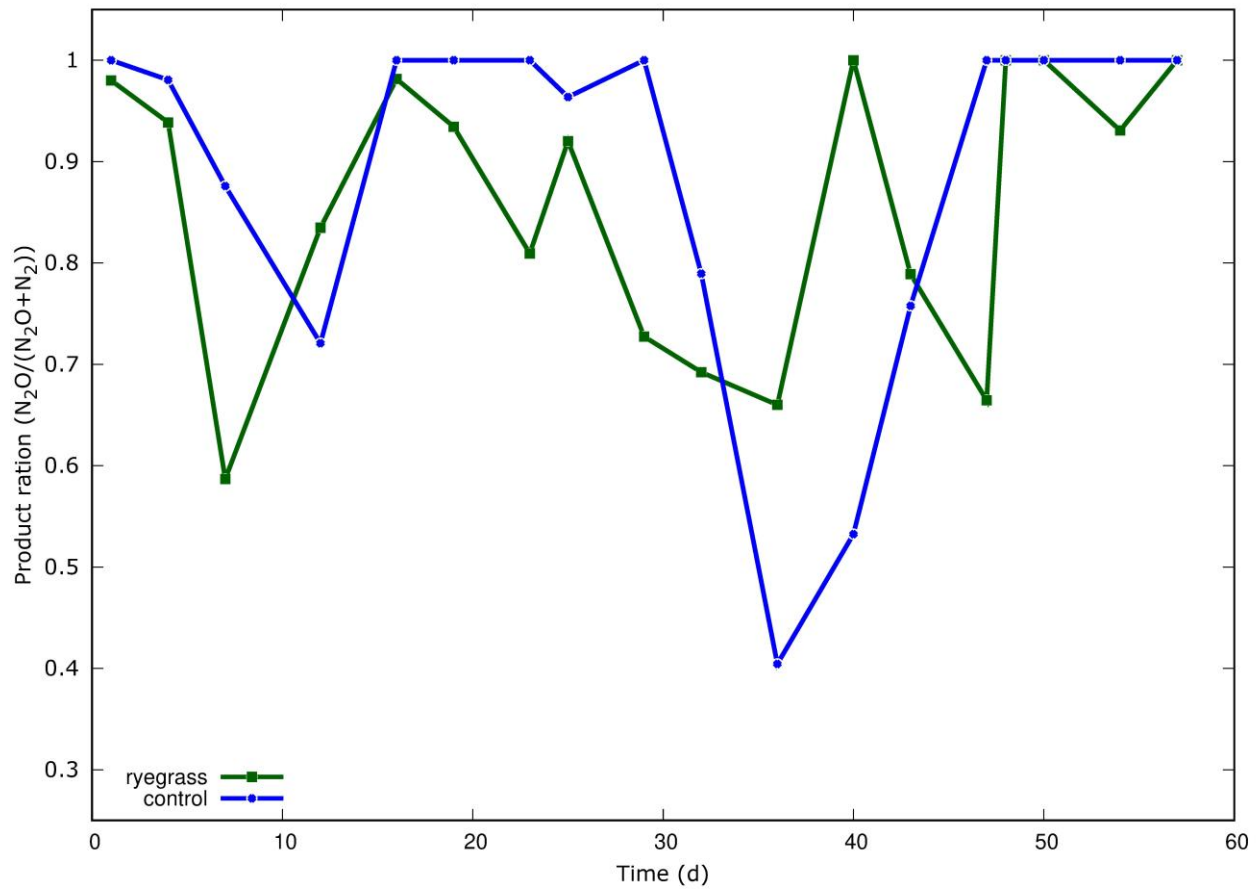

**Figure S5: the  $N_2O/(N_2+N_2O)$  product ratio throughout a laboratory incubation of a sandy arable soil from Fuhrberg, Germany.**

50 **Data shown is the average of four replicate re-packed soil cores for each treatment (i.e. with ryegrass amendment or control).**

55

60

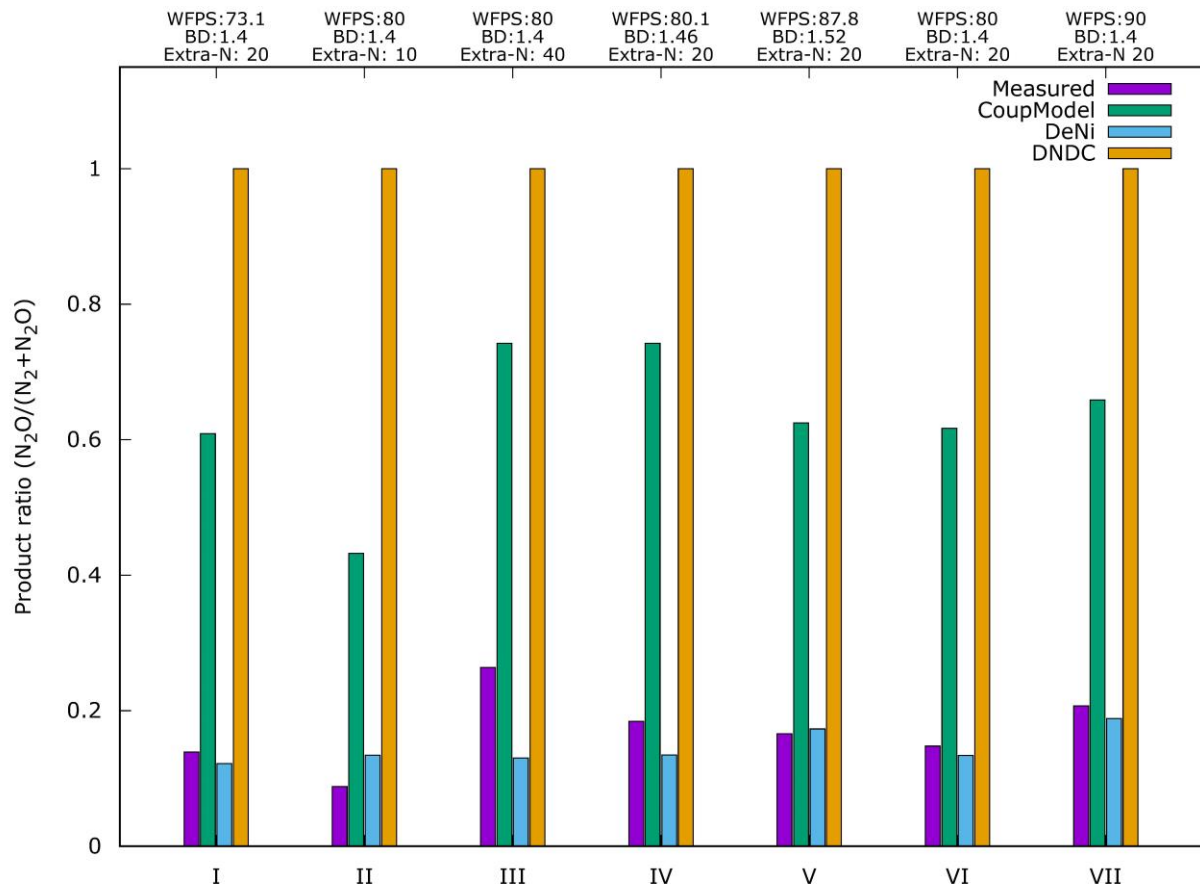

**Figure S6: the  $N_2O/(N_2+N_2O)$  ratio of flux measurements during a laboratory incubation of arable, silt-loam arable soil from Hattorf, Germany, compared with modeled fluxes using three biogeochemical models: Coup, DeNi and DNDC.**

65

70

75

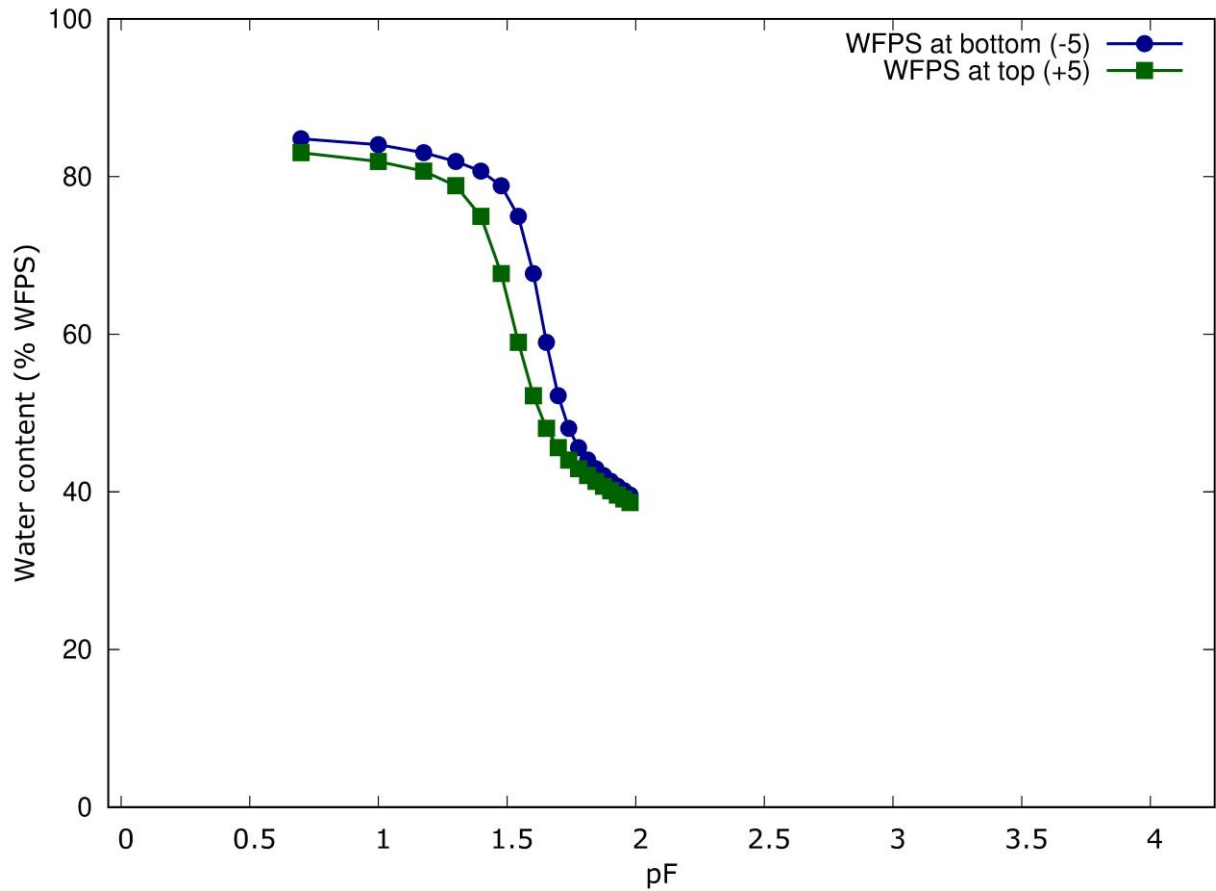

80 **Figure S7: water retention curve of a sandy arable soil from Fuhrberg, Germany, showing WFPS for the upper and lower boundary of the soil core in relation to pressure head (shown as  $pF = \log(-\text{cm H}_2\text{O})$  as calculated from core height assuming equilibrium conditions).**

85



90

Table S1: Experimental settings during a 5-8 week laboratory incubation of re-packed soil cores from Fuhrberg, Germany (sand) and Hattorf, Germany (silt-loam)

| Soil      | Week of Experiment                                                                  | 1   | 2   | 3   | 4   | 5       | 6   | 7   | 8   |
|-----------|-------------------------------------------------------------------------------------|-----|-----|-----|-----|---------|-----|-----|-----|
|           | Bottom water potential [kPa]                                                        | -10 | -20 | -60 | -60 | -10     | -10 | -10 | -10 |
|           | Temperature [°C]                                                                    | 20  | 20  | 20  | 20  | 20      | 10  | 5   | 10  |
| Sand      | Irrigation with water [mm]                                                          | -   | -   | -   | -   | 10      | -   | -   | -   |
|           | Irrigation with NO <sub>3</sub> <sup>-</sup> solution [mm / mg N kg <sup>-1</sup> ] | -   | -   | -   | -   | 30 / 30 | -   | -   | -   |
| Silt-loam | Temperature [°C]                                                                    | 10  | 6   | 2   | 6   | 10      | -   | -   | -   |

95

100

105

110

Table S2: The settings of the CoupModel – Switches

| Modules                  | Processes             | Name                          | Options                   |
|--------------------------|-----------------------|-------------------------------|---------------------------|
| Abiotic driving variable | Forcing               | Biological SoilWaterFlowInput | Simulated                 |
| External N Inputs        | conditions            | N fertilization               | Parameters                |
|                          |                       | N irrigation                  | on                        |
| Gas Processes            | Initial NC Conditions | Trace Gas Emission            | Direct loss               |
| Model structure          | Heat                  | HeatEq                        | off                       |
|                          | Organic               | Nitrogen and Carbon           | Abiotic driving variables |
|                          | General               | NitrogenCarbonStep            | Independent               |
|                          |                       | OnlyNC                        | Yes                       |
| Soil Hydraulic           | Storage               | Hydraulic Function            | Genuchten                 |
|                          | Water                 | Pedo Function                 | Texture parameters        |
| Soil mineral N Processes | Initial NC Conditions | Denit Depth Distrib.          | Constant                  |
|                          | Denitrification       | Denitrification               | Microbial based           |
|                          | Initial NC Conditions | Initial Nitrifier             | Constant                  |
|                          | Nitrification         | Nitrification                 | Microbial based           |
| Soil Organic Processes   | Transport             | Dissolved Organic             | On                        |

115

120

Table S3: The settings of the CoupModel – Parameters

| Modules                  | Process    | Name                  | Value                                           |                         |
|--------------------------|------------|-----------------------|-------------------------------------------------|-------------------------|
| Abiotic driving variable | Forcing    | Biological            | Soil Temperature                                | 20 °C                   |
|                          | Conditions |                       | Soil Water Content                              | 34.65 Vol.%             |
| Extra N inputs           | Forcing    | Biological            | N Fert Dis k                                    | 0.001                   |
|                          | Conditions |                       | N Fert NH <sub>4</sub> Frac                     | 0                       |
| Soil Mineral N Processes |            |                       | DMic_GrowthCoef_N <sub>2</sub> O                | 100 /day                |
|                          |            |                       | DMic_GrowthCoef_NO                              | 100 /day                |
|                          |            |                       | D_InhiHalfRateNO <sub>3</sub> _N <sub>2</sub> O | 50 mg/l                 |
|                          |            |                       | D_PH_HalfCoef                                   | 4.25                    |
|                          |            |                       | D_PH_ShapeCoef                                  | 0.5                     |
|                          |            | Denitrification       | DeNiActivityRateCoef                            | 1 /day                  |
|                          |            |                       | DenitNitrateHalfSat                             | 5                       |
|                          |            |                       | Dmic_EffCoef_N <sub>2</sub> O                   | 0.1                     |
|                          |            |                       | Dmic_EffCoef_NO                                 | 0.151                   |
|                          |            |                       | Dmic_RespCoef_N <sub>2</sub> O                  | 100 /day                |
|                          |            |                       | Dmic_RespCoef_NO                                | 20 /day                 |
|                          |            | Initial NC Conditions | InitDenitBiomass                                | 2 gN/m <sup>2</sup>     |
|                          |            | Denitrification       | NxOy_Doc_HalfRateCoef                           | 5 mg/l                  |
|                          |            |                       | NxOy_HalfRateCoef                               | 10 mg/l                 |
| Soil Organic Processes   |            | Decomposition         | Eff Litter1                                     | 0.3                     |
|                          |            |                       | Eff humus                                       | 0.3                     |
|                          |            |                       | Init H CN Tot                                   | 10                      |
|                          |            | Initial NC Conditions | Init H Depth                                    | -0.3 m                  |
|                          |            |                       | Init H NTot                                     | 213.82 g/m <sup>2</sup> |

|               |                    |                     |
|---------------|--------------------|---------------------|
|               | Init L1 CN Tot     | 15.1                |
|               | Init L1 Depth      | -0.3 m              |
|               | Init L1 NTot       | 20 g/m <sup>2</sup> |
|               | RateCoefHumus      | 0.00041 /day        |
| Decomposition | RateCoefHumusDis   | 0.0001 /day         |
|               | RateCoefLitter1    | 0.02 /day           |
|               | RateCoefLitter1Dis | 0.0005 /day         |

125

130

135

140

145 Table S4: The settings and capability of the CoupModel, DeNi and DNDC

|                              | CoupModel                                                                                                                 | DeNi                                                                                                        | DNDC                                         |
|------------------------------|---------------------------------------------------------------------------------------------------------------------------|-------------------------------------------------------------------------------------------------------------|----------------------------------------------|
| Run time                     | Daily/hourly                                                                                                              | Daily                                                                                                       | Daily                                        |
| NO <sub>3</sub> <sup>-</sup> | +                                                                                                                         | +                                                                                                           | +                                            |
| NH <sub>4</sub> <sup>+</sup> | +                                                                                                                         | +                                                                                                           | +                                            |
| C pools                      | +                                                                                                                         | -                                                                                                           | +                                            |
| N pools                      | +                                                                                                                         | -                                                                                                           | +                                            |
| C/N ratio                    | +                                                                                                                         | -                                                                                                           | +                                            |
| Daily water data             | +                                                                                                                         | +                                                                                                           | -                                            |
| Water retention curve        | +                                                                                                                         | -                                                                                                           | -                                            |
| Soil specific water data     | -                                                                                                                         | +                                                                                                           | +                                            |
| Decomposition                | First order kinetic                                                                                                       | $S_{CO_2} = S_{max} \frac{S_{WFPS}}{S_{SoilTemp}}$                                                          | First order kinetic                          |
| Nitrification                | nitrifying microbes are simulated explicitly or not explicitly                                                            | empirical function taking NH <sub>4</sub> <sup>+</sup> , pH and respiration into account                    | nitrifying microbes are simulated explicitly |
| Denitrification              | Denitrifiers are simulated explicitly; considering mineral N, and WFPS, C <sub>org</sub> , CO <sub>2</sub> and soil depth | empirical function taking NO <sub>3</sub> <sup>-</sup> , WFPS simulated explicitly respiration into account | Denitrifiers are simulated explicitly        |

Table S5. the effect of the water manipulation (Table S5.; suction or irrigation) on the  $\text{NO}_3^-$  content (4 replicates of 2 treatments: C1-4 with and C5-8 without ryegrass) of a sandy arable soil from Fuhrberg, Germany. The table shows the decrease or increase of the  $\text{NO}_3^-$  concentration of the soils between the treatment events according to the removed or added water. The values were estimated from the  $\text{NO}_3^-$  concentration of the leachate or added water.

| Days | Core 1                                   | Core 2 | Core 3 | Core 4 | Core 5 | Core 6 | Core 7 | Core 8 |
|------|------------------------------------------|--------|--------|--------|--------|--------|--------|--------|
|      | $\text{NO}_3^-$ (mg N $\text{kg}^{-1}$ ) |        |        |        |        |        |        |        |
| 8    | -7.37                                    | -13.54 | -0.67  | -5.82  | -22.31 | -33.84 | -33.39 | -33.56 |
| 9    | -7.93                                    | -9.64  | -0.94  | -1.84  | -2.89  | -5.61  | -6.42  | -5.09  |
| 17   | -2.07                                    | -1.00  | -0.14  | -0.10  | -1.73  | -3.87  | -3.73  | -4.36  |
| 24   | -2.04                                    | -1.10  | -0.07  | -0.03  | -6.72  | -2.06  | -3.04  | -3.49  |
| 29   | -23.31                                   | -13.89 | -4.55  | -0.47  | -3.95  | -8.66  | -14.03 | -11.86 |
| 31   | -24.13                                   | -28.69 | -17.14 | -20.79 | -27.02 | -25.64 | -36.19 | -29.18 |
| 32   | 14.66                                    | 14.66  | 14.66  | 14.66  | 14.66  | 14.66  | 14.66  | 14.66  |

155

160

165

170

Table S6. water manipulation (irrigation water or leachate, extra NO<sub>3</sub><sup>-</sup>) data of the 1-4 ryegrass treated and 5-8 control columns of for a laboratory incubation of sandy arable soil from Fuhrberg, Germany

| Days | Leaching water (ml) |        |        |        |        |        |        |        | Added water (ml) | Extra KNO <sub>3</sub><br>mg NO <sub>3</sub> <sup>-</sup> / dm <sup>3</sup> |
|------|---------------------|--------|--------|--------|--------|--------|--------|--------|------------------|-----------------------------------------------------------------------------|
|      | Core 1              | Core 2 | Core 3 | Core 4 | Core 5 | Core 6 | Core 7 | Core 8 | Core 1-8         | Core 1-8                                                                    |
| 5    | 0                   | 0      | 0      | 0      | 101.93 | 0      | 0      | 0      | -                | -                                                                           |
| 9    | 55                  | 120    | 39     | 167    | 229    | 220    | 210    | 214    | -                | -                                                                           |
| 17   | 68                  | 128    | 52     | 90     | 44     | 45     | 49     | 39     | -                | -                                                                           |
| 23   | 24                  | 22     | 23     | 19     | 28     | 34     | 28     | 32     | -                | -                                                                           |
| 25   | 24                  | 22     | 23     | 19     | 193    | 28     | 34     | 28     | -                | -                                                                           |
| 29   | -                   | -      | -      | -      | -      | -      | -      | -      | 162.9            | -                                                                           |
| 31   | 246                 | 239    | 228    | 231    | 216    | 254    | 236    | 222    | 488.7            | 30                                                                          |
| 32   | 533                 | 564    | 519    | 523    | 542    | 531    | 524    | 574    | -                | -                                                                           |
| 58   | 154                 | 105    | 126    | 96     | 75     | 64     | 72     | 69     | -                | -                                                                           |

175

180

185

Table S7: Averages and standard deviation (n=4) of measured cumulative fluxes ( $N_2$ ,  $N_2O$ ,  $N_2+N_2O$ :  $g\ N\ m^{-2}\ day^{-1}$ ;  $CO_2$ :  $g\ C\ m^{-2}\ day^{-1}$ ) and  $N_2O/(N_2+N_2O)$  ratio of cumulated fluxes (dimensionless) from two laboratory incuatiions: arable, silt-loam soil from Hattorf, Germany (34 days; 7 treatments) and arable, sandy soil from Fuhrberg, Germany (58 days; 2 treatments). Shown in the treatment column are added  $NO_3^-$  (10/20/40  $mg\ KNO_3-N / kg\ dry\ soil$ ), water-filled pore space (WFPS; 73-90%) and bulk density (BD; 1.4-1.52  $g\ cm^{-3}$ ) for the silt-loam soil. Superscript letters indicate significant differences within sites, between treatments ( $p < 0.05$ ; Tukey HSD for silt-loam and Wilcoxon for sand).

|     | Treatment            | $N_2$       | $N_2O$      | $N_2+N_2O$                 | $N_2O/(N_2+N_2O)$ | $CO_2$                     |
|-----|----------------------|-------------|-------------|----------------------------|-------------------|----------------------------|
|     | N: 20                |             |             |                            |                   |                            |
| I   | WFPS: 73<br>BD: 1.4  | 0.118±0.133 | 0.019±0.022 | 0.137 <sup>c</sup> ±0.140  | 0.139             | 1.295 <sup>a</sup> ±0.715  |
|     | N: 10                |             |             |                            |                   |                            |
| II  | WFPS: 80<br>BD: 1.4  | 0.042±0.026 | 0.004±0.002 | 0.046 <sup>c</sup> ±0.025  | 0.088             | 1.142 <sup>a</sup> ±0.273  |
|     | Silt-loam soil       |             |             |                            |                   |                            |
|     | N: 40                |             |             |                            |                   |                            |
| III | WFPS: 80<br>BD: 1.4  | 0.156±0.116 | 0.056±0.025 | 0.212 <sup>ab</sup> ±0.137 | 0.264             | 0.368 <sup>bc</sup> ±0.515 |
|     | N: 40                |             |             |                            |                   |                            |
| IV  | WFPS: 80<br>BD: 1.46 | 0.114±0.107 | 0.026±0.025 | 0.140 <sup>bc</sup> ±0.131 | 0.184             | 1.041 <sup>ab</sup> ±0.434 |
|     | N: 20                |             |             |                            |                   |                            |
| V   | WFPS: 88<br>BD: 1.52 | 0.278±0.124 | 0.055±0.016 | 0.333 <sup>a</sup> ±0.138  | 0.166             | 0.158 <sup>c</sup> ±0.212  |



|      |                   |               |             |             |                            |       |  |                           |
|------|-------------------|---------------|-------------|-------------|----------------------------|-------|--|---------------------------|
|      |                   |               |             |             |                            |       |  |                           |
|      |                   |               |             |             |                            |       |  | N: 20                     |
| VI   | WFPS: 80          |               | 0.049±0.049 | 0.009±0.011 | 0.058 <sup>c</sup> ±0.059  | 0.148 |  | 1.251 <sup>a</sup> ±0.503 |
|      |                   |               |             |             |                            |       |  | BD: 1.4                   |
|      |                   |               |             |             |                            |       |  | N: 20                     |
| VII  | WFPS: 90          |               | 0.064±0.049 | 0.017±0.009 | 0.081 <sup>bc</sup> ±0.051 | 0.207 |  | 0.190 <sup>c</sup> ±0.316 |
|      |                   |               |             |             |                            |       |  | BD: 1.4                   |
| C1-4 | Added<br>ryegrass | Sandy<br>soil | 0.490±0.075 | 4.82±0.632  | 5.31 <sup>a</sup> ±0.677   | 0.908 |  | 52.7 <sup>a</sup> ±9.74   |
| C5-8 | Control           |               | 0.053±0.005 | 0.638±0.097 | 0.691 <sup>b</sup> ±0.100  | 0.924 |  | 15.2 <sup>b</sup> ±2.06   |
